# Supplementary figures and images for: Downregulated plasma miR-92a levels have clinical impact on multiple myeloma and related disorders
Source: PubMed Central journal article supplement — Blood Cancer J. 2012 Jan 20;2(1):e53–. doi: 10.1038/bcj.2011.51 (PMC3270255; doi:10.1038/bcj.2011.51), 2012-01-20

# Supplementary Figure 1

## A

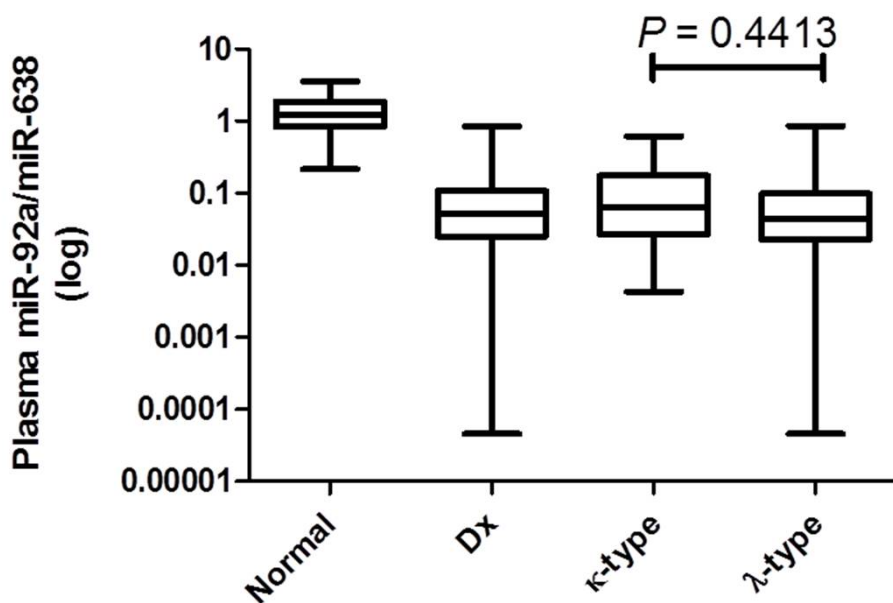

## B

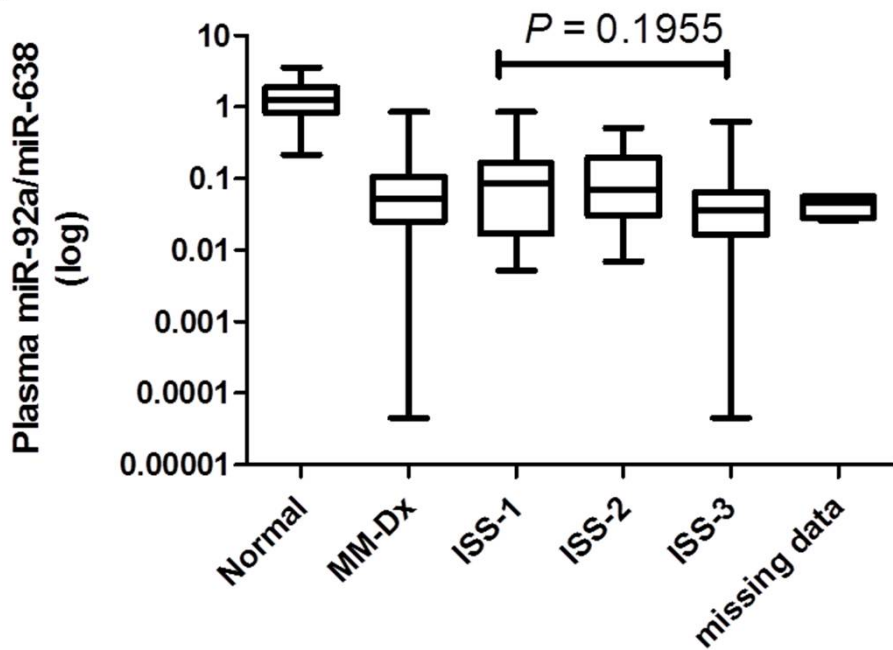

Supplement: bcj201151x1.pdf [file bcj201151x1.pdf]

## Supplementary Figure 2

A

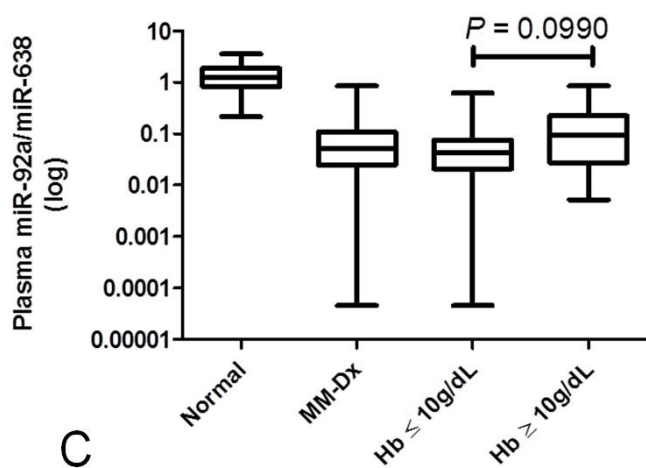

B

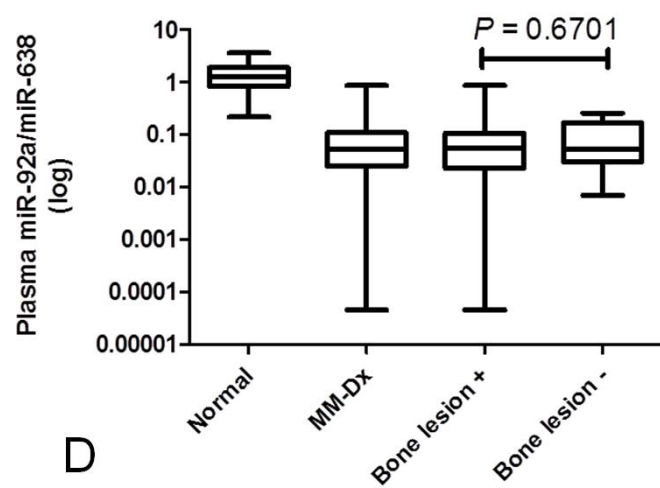

C

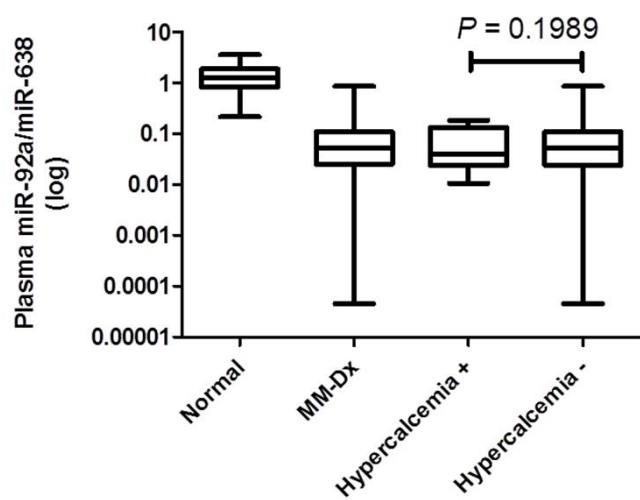

D

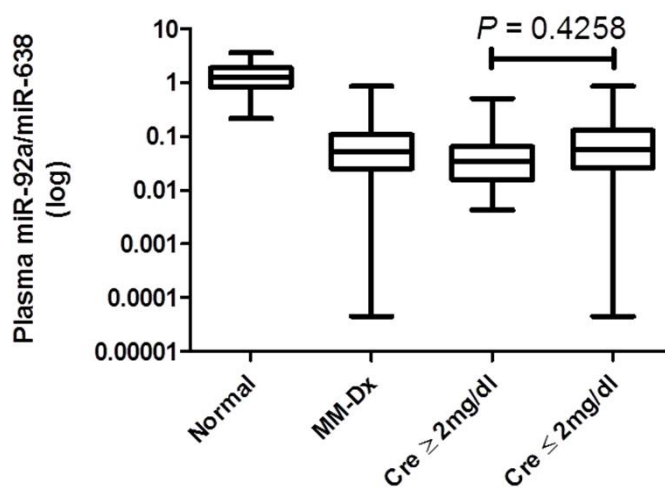

Supplement: bcj201151x2.pdf [file bcj201151x2.pdf]
